# Supplementary material for: YF17D-vectored Ebola vaccine candidate protects mice against lethal surrogate Ebola and yellow fever virus challenge
Source: PubMed Central journal article supplement (PMC10336040; doi:10.1038/s41541-023-00699-7), 2023-07-11
Supplement: 41541_2023_699_MOESM1_ESM.pdf [file 41541_2023_699_MOESM1_ESM.pdf]

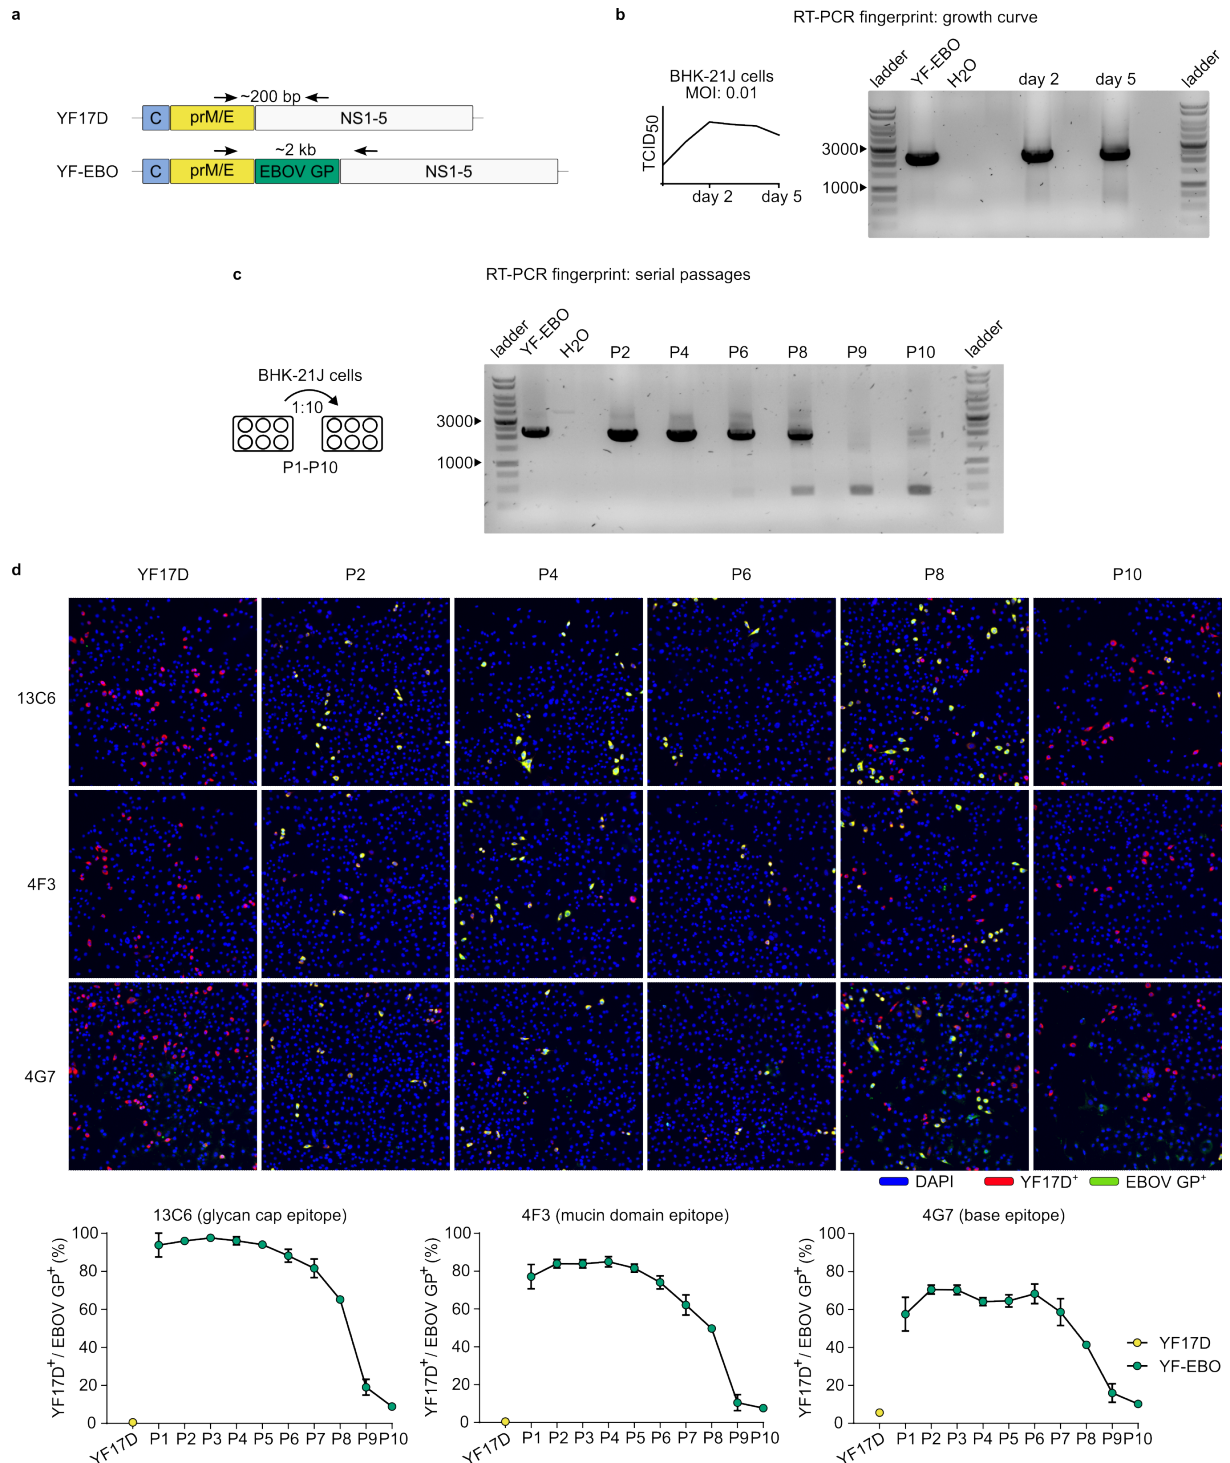

### Supplementary Figure 1: Genetic stability of YF-EBO

Related to figure 1. **a**. Schematic representation of RT-PCR based detection of the EBOV GP antigen. Arrows indicate primer binding sites on the viral genome. **b**. RT-PCR fingerprint of viral RNA extracted from supernatants of day 2 and day 5 of growth curve (Fig. 1c) and **c**. viral RNA extracted from infected BHK-21J supernatants of serially passaged YF-EBO (P2–P10). PCR amplicons of pShuttle-YF-EBO were amplified using the same primer pair and served as positive control. H<sub>2</sub>O was included as a negative control. ladder, 1-kb DNA ladder. **d**.

Representative overlay images (10x objective) of immunofluorescent stainings which detect the co-expression of both YF17D (red) and EBOV GP (green) antigens and nuclei (stained with DAPI, blue) in BHK-21J cells infected with serial passages of YF-EBO (P1-10). Three different monoclonal antibodies targeting different epitopes of EBOV GP (13C6, 4F3 and 4G7) were used in the stainings. Graphs show the mean percentage of YF17D-infected cells that co-express EBOV GP quantified by high content image analysis. Cells infected with YF17D served as a negative control. Error bars indicate SEM ( $n = 8$ ).

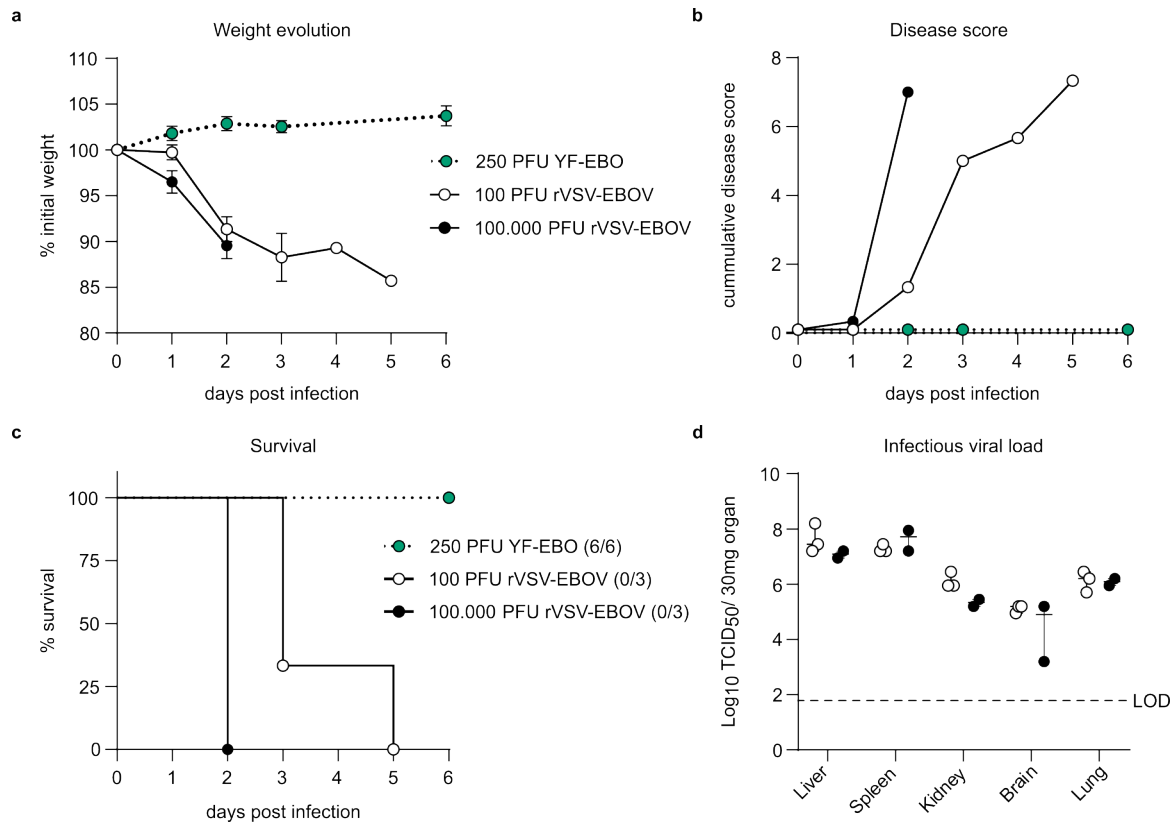

## Supplementary Figure 2: rVSV-EBOV infection in mice

*Ifnar*<sup>-/-</sup> mice were infected intraperitoneally with 100 ( $n = 3$ ) or 100,000 PFU ( $n = 3$ ) of rVSV-EBOV and monitored for the development of disease symptoms. **a.** Weight evolution after infection with rVSV-EBOV, as a comparison the dotted line represents weight evolution of *Ifnar*<sup>-/-</sup> mice ( $n = 6$ ) after vaccination (intraperitoneal inoculation with 250 PFU of YF-EBO; data as in Figure 2a). Error bars represent SEM. **b.** Mean cumulative disease score, based on IACUC parameters (see Supplementary table S1) including: body weight changes, body condition score, behaviour and physical appearance. **c.** Survival curve. The number of surviving mice at study endpoint are indicated within parentheses. **d.** rVSV-EBOV infectious viral loads in different organs collected at the day of euthanasia and quantified by virus titration on Vero E6 cells. Data are median  $\pm$  IQR, dashed line represents limit of detection (LOD) (d).

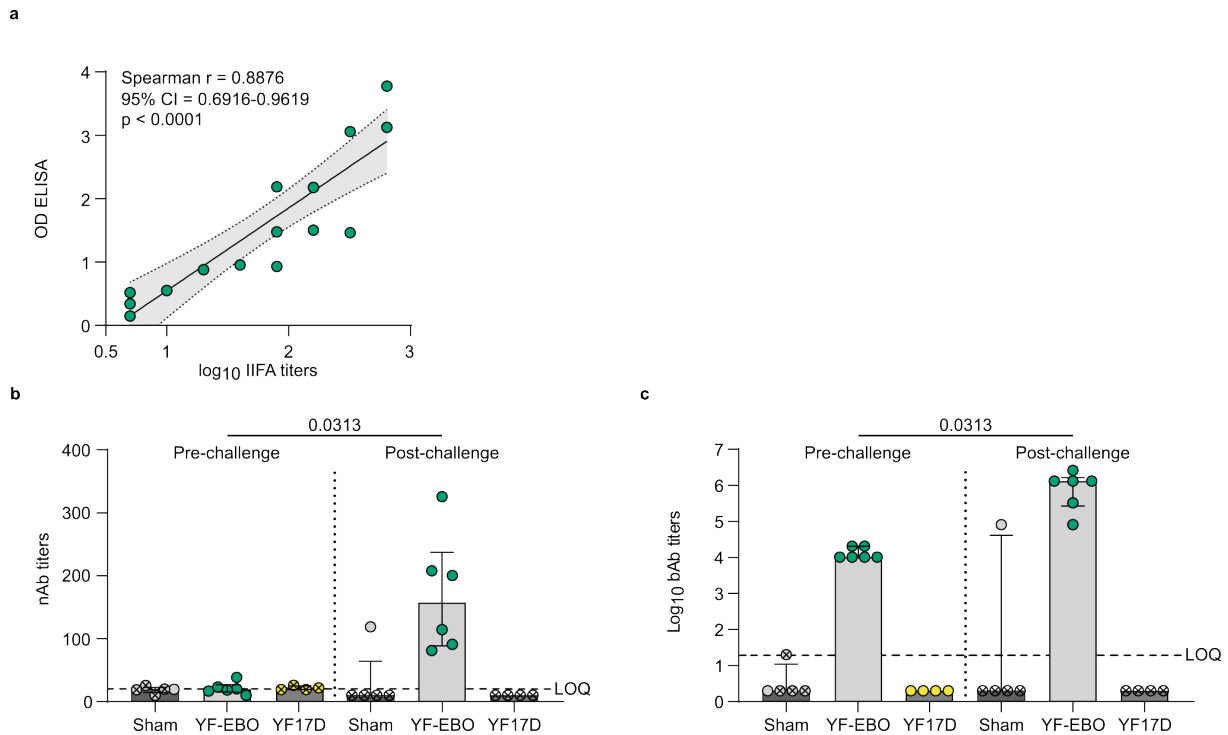

**Supplementary Figure 3: Correlation between EBOV GP specific IIFA and ELISA and comparison of EBOV-specific humoral immunity pre- and post-challenge**

Related to figure 3. **a.** EBOV GP IgG binding antibody (bAb) titers were determined in serially diluted serum samples ( $n=16$ ) from vaccinated mice ( $n=3$ ) by IIFA and ELISA. Linear regression analysis was performed to calculate the Spearman correlation coefficient between IIFA titers and ELISA optical densities (OD) and is indicated by a black solid line, 95% confidence intervals (CI) are indicated by grey shaded areas. The Spearman correlation coefficient  $r$ , 95% CI and  $p$ -value are indicated. **b.** Pre-challenge (four weeks post-vaccination) and post-challenge (2 weeks post-challenge) rVSV-EBOV GP-specific neutralizing antibody (nAb) titers determined by rVSV-EBOV seroneutralization test and **c.** EBOV GP-specific IgG binding antibody (bAb) titers determined by IIFA, present in serum of mice vaccinated with 250 PFU (YF-EBO  $n = 6$ ; YF17D  $n = 4$ ; sham  $n = 5$ ). Mice that succumbed to rVSV-EBOV infection are represented with an 'x'. Dashed line represents limit of quantification (LOQ), data are median  $\pm$ IQR and two-tailed Wilcoxon matched-pairs signed rank test was applied, significant  $p$ -values  $< 0.05$  are indicated (b-c).

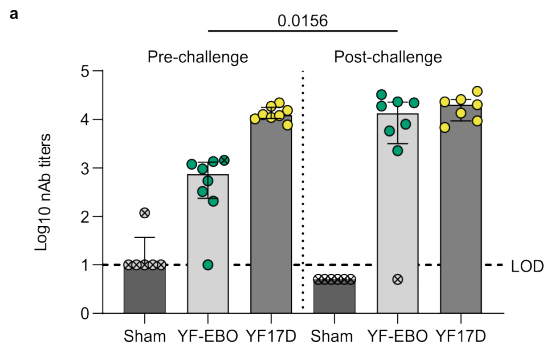

### Supplementary Figure 4: Comparison of YFV-specific humoral immunity pre- and post-challenge

Related to figure 4. **a.** Pre-challenge (four weeks post-vaccination) and post-challenge (2 weeks post-challenge) YF17D-specific neutralizing antibody (nAb) titers determined by YFV seroneutralization test, present in serum of mice vaccinated with 250 PFU (YF-EBO  $n = 8$ ; DYF17D  $n = 8$ ; sham  $n = 6$ ). Mice that succumbed to intracranial YF17D infection are represented with an 'x'. Dashed line represents limit of detection (LOD), data are median  $\pm$ IQR and two-tailed Wilcoxon matched-pairs signed rank test was applied, significant  $p$ -values  $< 0.05$  are indicated (a).

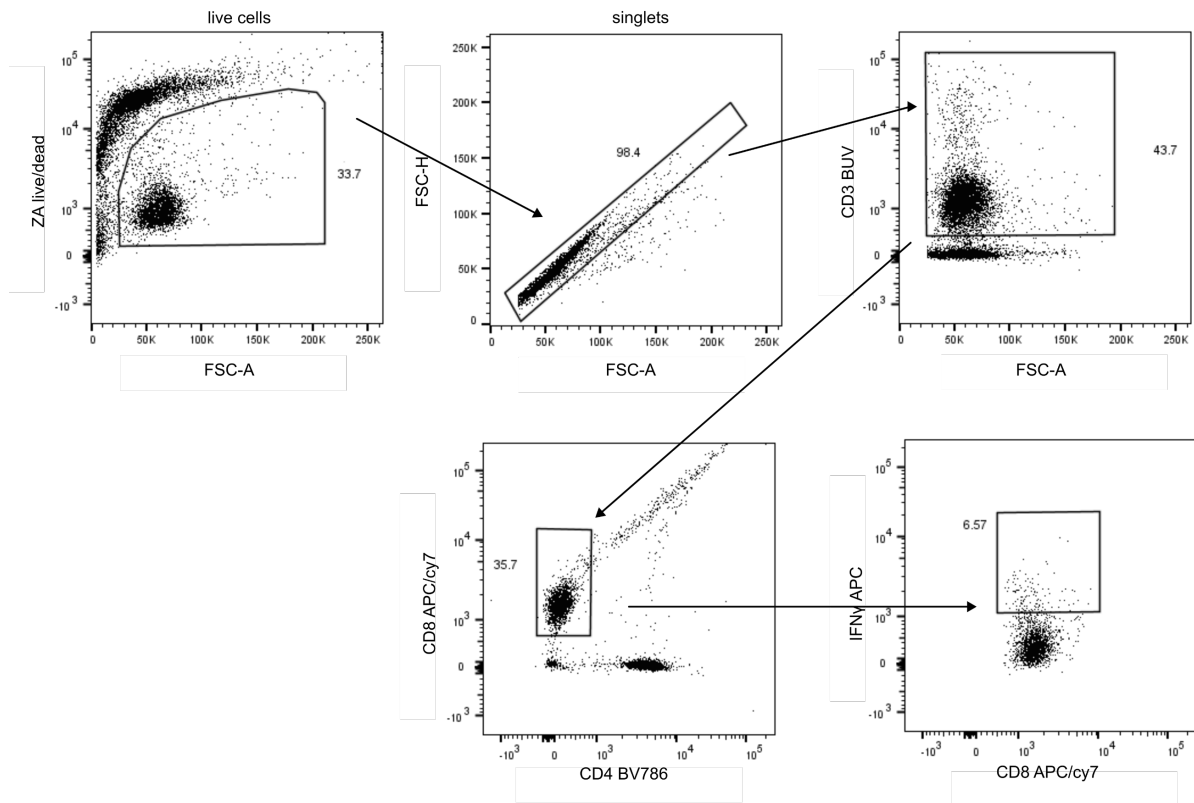

### Supplementary Figure 5: Gating strategy

First, live cells were selected by gating out Zombie Aqua (ZA)-positive and low forward scatter (FSC) events. Then, doublets were eliminated in an FSC-H versus FSC-A plot. T cells (CD3+) were stratified into CD8 T cells (CD8+). Boundaries defining positive and negative populations for intracellular marker (IFN $\gamma$ ) were set on the basis of non-stimulated control samples.

Panel b

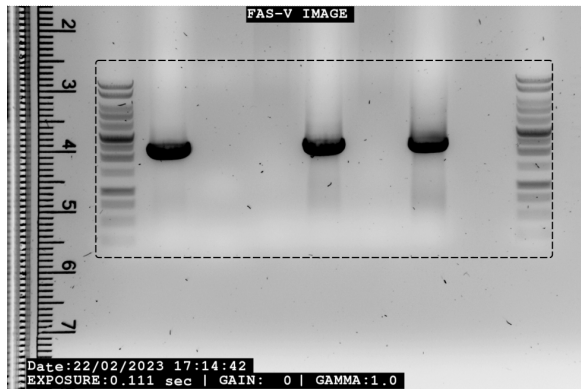

Panel c

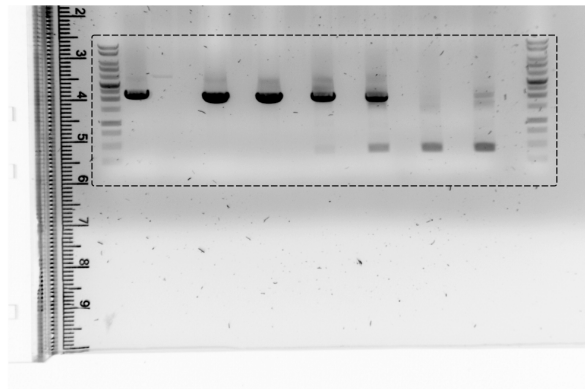

### Supplementary Figure 6: Uncropped gels

Uncropped RT-PCR gels. Dotted lines specify each area which was cropped to generate respective panels in supplementary Fig.1b and 1c as indicated.

**Supplementary Table 1: IACUC disease-scoring list**

| Category             | Score | Criteria                                                                          |
|----------------------|-------|-----------------------------------------------------------------------------------|
| Body weight changes  | 0     | Normal                                                                            |
|                      | 1     | <10% Weight loss                                                                  |
|                      | 2     | 10-15% Weight loss                                                                |
|                      | 3     | >20% Weight loss                                                                  |
| Body-condition score | 0     | Well-conditioned (vertebrae, pelvic, or spinal bones not prominent)               |
|                      | 1     | Under-conditioned (evident vertebral segmentation; pelvic bones readily palpable) |
|                      | 2     | Emaciation (skeletal structures extremely prominent; little or no flesh cover)    |
| Physical appearance  | 0     | Normal                                                                            |
|                      | 1     | Lack of grooming                                                                  |
|                      | 2     | Rough coat, nasal/ocular discharge                                                |
|                      | 3     | Very rough coat, abnormal posture                                                 |
| Behaviour            | 0     | Normal                                                                            |
|                      | 1     | Minor changes (e.g., limping)                                                     |
|                      | 2     | Abnormal; reduced mobility, inactive                                              |
|                      | 3     | Unsolicited vocalizations, self-mutilation, either very restless or immobile      |
